# Supplementary material for: Chlorophylls Extraction from Spinach Leaves Using Aqueous Solutions of Surface-Active Ionic Liquids
Source: MDPI journal article supplement (doi:10.3390/suschem2040040), 2021-12-14
Supplement: s1 [file s1]

## Article

# Chlorophylls Extraction from Spinach Leaves Using Aqueous Solutions of Surface-Active Ionic Liquids

Ana M. Ferreira <sup>†</sup>, Ana Cláudia Leite <sup>†</sup>, João A. P. Coutinho and Mara G. Freire <sup>\*</sup>

CICECO—Aveiro Institute of Materials, Department of Chemistry, University of Aveiro, 3810-193 Aveiro, Portugal; ana.conceicao@ua.pt (A.M.F.); anaclaudialeite@ua.pt (A.C.L.); jcoutinho@ua.pt (J.A.P.C.)

<sup>\*</sup> Correspondence: maragfreire@ua.pt

<sup>†</sup> These authors contributed equally to this work.

**Table S1.** 2<sup>2</sup> factorial planning.

| Experiment | $\chi^1$ | $\chi^2$ |
|------------|----------|----------|
| 1          | −1       | −1       |
| 2          | 1        | −1       |
| 3          | −1       | 1        |
| 4          | 1        | 1        |
| 5          | −1.41    | 0        |
| 6          | 1.41     | 0        |
| 7          | 0        | −1.41    |
| 8          | 0        | 1.41     |
| 9          | 0        | 0        |
| 10         | 0        | 0        |
| 11         | 0        | 0        |

**Table S2.** Independent variables coded levels used in factorial planning using [C<sub>16</sub>py]Cl aqueous solutions.

| Independent variables     | Coded levels         |                       |                    |                      |                     |
|---------------------------|----------------------|-----------------------|--------------------|----------------------|---------------------|
|                           | Axial point<br>−1.41 | Factorial point<br>−1 | Central point<br>0 | Factorial point<br>1 | Axial point<br>1.41 |
| CPC concentration (wt. %) | 2.95                 | 5.00                  | 10.00              | 15.00                | 17.05               |
| Solid-liquid ratio (R)    | 0.003                | 0.005                 | 0.010              | 0.015                | 0.017               |

**Table S3.** Independent variables coded levels used in factorial planning using ethanol solutions.

| Independent variables     | Coded levels         |                       |                    |                      |                     |
|---------------------------|----------------------|-----------------------|--------------------|----------------------|---------------------|
|                           | Axial point<br>−1.41 | Factorial point<br>−1 | Central point<br>0 | Factorial point<br>1 | Axial point<br>1.41 |
| Ethanol concentration (%) | 58.85                | 65.00                 | 80.00              | 95.00                | 101.15              |
| Solid-liquid ratio (R)    | 0.003                | 0.005                 | 0.010              | 0.015                | 0.017               |

**Table S4.** Surface-active ionic liquids used in this work, and their respective critical micellar concentrations (CMC) and IL concentration values (in mM) applied in chlorophyll extraction - IL screening.

| Ionic liquid name                         | Abbreviation            | CMC (mM) | [IL]* (mM) | REF. |
|-------------------------------------------|-------------------------|----------|------------|------|
| Myristyltrimethylammonium bromide         | [N <sub>11114</sub> ]Br | 3.75     | 297        | [1]  |
| Hexadecylpyridinium chloride              | [C <sub>16</sub> py]Cl  | 0.99     | 294        | [2]  |
| Cetylpyridium bromide                     | [C <sub>16</sub> py]Br  | 0.33     | 260        | [3]  |
| 1-methyl-3-tetradecylimidazolium chloride | [C <sub>14</sub> mim]Cl | 3.90     | 318        | [4]  |
| Hexadecyltrimethylammonium bromide        | [N <sub>16111</sub> ]Br | 0.91     | 274        | [5]  |
| Tributyltetradecylphosphonium chloride    | [P <sub>44414</sub> ]Cl | 8.10     | 230        | [6]  |

\*which corresponds to a concentration of 10wt%

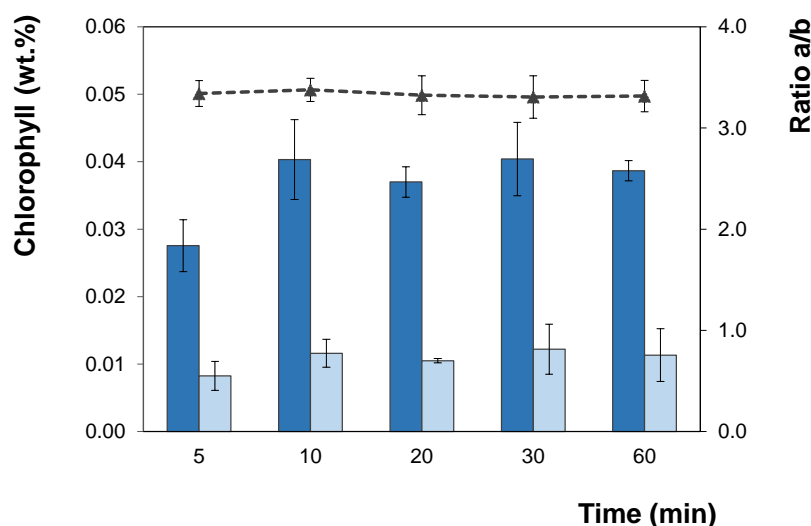**Figure S1.** Yield of extracted chlorophyll *a* (■) and chlorophyll *b* (□) from spinach leaves using 10 wt.% [C<sub>16</sub>py]Cl solution in water and different extraction times (R=0.02; T=25°C) and chlorophyll *a/b* ratio (▲).**Table S5.** Experimental data and response surface predicted values of the factorial planning using [C<sub>16</sub>py]Cl aqueous solutions.

|   | [IL]<br>(wt. %) | R     | Chlorophyll <i>a</i> (wt. %) |       |                    | Chlorophyll <i>b</i> (wt. %) |       |                    | Chlorophyll <i>a/b</i> ratio |       |                    |
|---|-----------------|-------|------------------------------|-------|--------------------|------------------------------|-------|--------------------|------------------------------|-------|--------------------|
|   |                 |       | Exp.                         | Pred. | relative error (%) | Exp.                         | Pred. | relative error (%) | Exp.                         | Pred. | relative error (%) |
| 1 | 5.0             | 0.005 | 0.062                        | 0.058 | 5.7                | 0.019                        | 0.018 | 2.1                | 3.32                         | 3.19  | 4.1                |
| 2 | 15.0            | 0.005 | 0.075                        | 0.079 | -4.6               | 0.018                        | 0.019 | -5.3               | 4.18                         | 4.04  | 3.2                |
| 3 | 5.0             | 0.015 | 0.058                        | 0.055 | 6.6                | 0.025                        | 0.026 | -3.7               | 2.33                         | 2.05  | 12.4               |
| 4 | 15.0            | 0.015 | 0.084                        | 0.087 | -3.7               | 0.020                        | 0.022 | -11.5              | 4.28                         | 3.99  | 6.7                |
| 5 | 3.0             | 0.010 | 0.058                        | 0.063 | -8.9               | 0.023                        | 0.023 | -0.1               | 2.52                         | 2.74  | -8.5               |
| 6 | 17.1            | 0.010 | 0.105                        | 0.100 | 4.6                | 0.022                        | 0.021 | 8.5                | 4.68                         | 4.71  | -0.7               |

|    |      |       |       |       |      |       |       |      |      |      |       |
|----|------|-------|-------|-------|------|-------|-------|------|------|------|-------|
| 7  | 10.0 | 0.003 | 0.056 | 0.056 | 0.1  | 0.017 | 0.017 | 0.1  | 3.29 | 3.32 | −0.9  |
| 8  | 10.0 | 0.017 | 0.059 | 0.060 | −0.7 | 0.027 | 0.025 | 7.0  | 2.23 | 2.48 | −11.1 |
| 9  | 10.0 | 0.010 | 0.064 | 0.064 | 0.1  | 0.021 | 0.022 | −1.5 | 3.00 | 2.93 | 2.3   |
| 10 | 10.0 | 0.010 | 0.064 | 0.064 | 0.7  | 0.020 | 0.022 | −6.9 | 3.18 | 2.93 | 7.8   |
| 11 | 10.0 | 0.010 | 0.063 | 0.064 | −0.8 | 0.023 | 0.022 | 7.2  | 2.72 | 2.93 | −7.9  |

**Nomenclature:** [IL]: IL concentration; R: solid-liquid ratio; Exp.: experimental data; Pred.: predicted values.

**Table S6.** Regression coefficients of the predicted second-order polynomial model for the chlorophyll *a*, from factorial planning using [C<sub>16</sub>py]Cl aqueous solutions. R-sqr=.95436; Adj.:.90871.

|                     | Regression coefficients | Standard deviation | t-student | p-value  |
|---------------------|-------------------------|--------------------|-----------|----------|
| <b>Interception</b> | 0.071                   | 0.01412            | 5.04383   | 0.003954 |
| R                   | 1.309                   | 1.77788            | 0.73625   | 0.494649 |
| R <sup>2</sup>      | −115.310                | 75.29066           | −1.53154  | 0.186202 |
| C                   | −0.006                  | 0.00178            | −3.19629  | 0.024095 |
| C <sup>2</sup>      | 0.000                   | 0.00008            | 4.71753   | 0.005254 |
| C × R               | 0.123                   | 0.08910            | 1.38040   | 0.225986 |

**Table S7.** Regression coefficients of the predicted second-order polynomial model for the chlorophyll *b*, from factorial planning using [C<sub>16</sub>py]Cl aqueous solutions. R-sqr=.78277; Adj.:.56555.

|                     | Regression coefficients | Standard deviation | t-student | p-value  |
|---------------------|-------------------------|--------------------|-----------|----------|
| <b>Interception</b> | 0.0119                  | 0.00617            | 1.92552   | 0.112133 |
| R                   | 1.2933                  | 0.77723            | 1.66395   | 0.157007 |
| R <sup>2</sup>      | −14.1957                | 32.91454           | −0.43129  | 0.684220 |
| C                   | 0.0003                  | 0.00078            | 0.36228   | 0.731949 |
| C <sup>2</sup>      | 0.0000                  | 0.00003            | 0.04722   | 0.964165 |
| C × R               | −0.0478                 | 0.03895            | −1.22618  | 0.274724 |

**Table S8.** Regression coefficients of the predicted second-order polynomial model for the chlorophyll *a/b* ratio, from factorial planning using [C<sub>16</sub>py]Cl aqueous solutions. R-sqr=.94078; Adj.:.88156.

|                     | Regression coefficients | Standard deviation | t-student | p-value  |
|---------------------|-------------------------|--------------------|-----------|----------|
| <b>Interception</b> | 4.758                   | 0.894              | 5.32284   | 0.003133 |
| R                   | −157.089                | 112.594            | −1.39519  | 0.221763 |
| R <sup>2</sup>      | −579.551                | 4768.170           | −0.12155  | 0.907992 |
| C                   | −0.289                  | 0.113              | −2.56558  | 0.050305 |
| C <sup>2</sup>      | 0.016                   | 0.005              | 3.42022   | 0.018834 |
| C × R               | 10.919                  | 5.643              | 1.93516   | 0.110756 |

**Table S9.** ANOVA results for the chlorophyll *a* extraction from factorial planning using [C<sub>16</sub>py]Cl aqueous solutions.

| Chlorophyll <i>a</i> |                |                    |             |          |          |
|----------------------|----------------|--------------------|-------------|----------|----------|
|                      | Sum of squares | Degrees of freedom | Mean square | F-value  | p-value  |
| Regression           | 0.002056       | 5                  | 0.000411    | 17.43268 | 0.003510 |
| Residuals            | 0.000118       | 5                  | 0.000024    |          |          |
| Total                | 0.002174       |                    |             |          |          |

**Table S10.** ANOVA results for the chlorophyll *b* extraction from factorial planning using [C<sub>16</sub>py]Cl aqueous solutions.

| Chlorophyll <i>b</i> |                |                    |             |          |          |
|----------------------|----------------|--------------------|-------------|----------|----------|
|                      | Sum of squares | Degrees of freedom | Mean square | F-value  | p-value  |
| Regression           | 0.000072       | 5                  | 0.000014    | 4.731408 | 0.046614 |
| Residuals            | 0.000015       | 5                  | 0.000003    |          |          |
| Total                | 0.000087       |                    |             |          |          |

**Table S11.** ANOVA results for the chlorophyll *a/b* ratio extraction from factorial planning using [C<sub>16</sub>py]Cl aqueous solutions.

| Chlorophyll <i>b</i> |                |                    |             |          |          |
|----------------------|----------------|--------------------|-------------|----------|----------|
|                      | Sum of squares | Degrees of freedom | Mean square | F-value  | p-value  |
| Regression           | 6.350867       | 5                  | 1.270173    | 17.17165 | 0.003634 |
| Residuals            | 0.369846       | 5                  | 0.073969    |          |          |
| Total                | 6.720713       |                    |             |          |          |

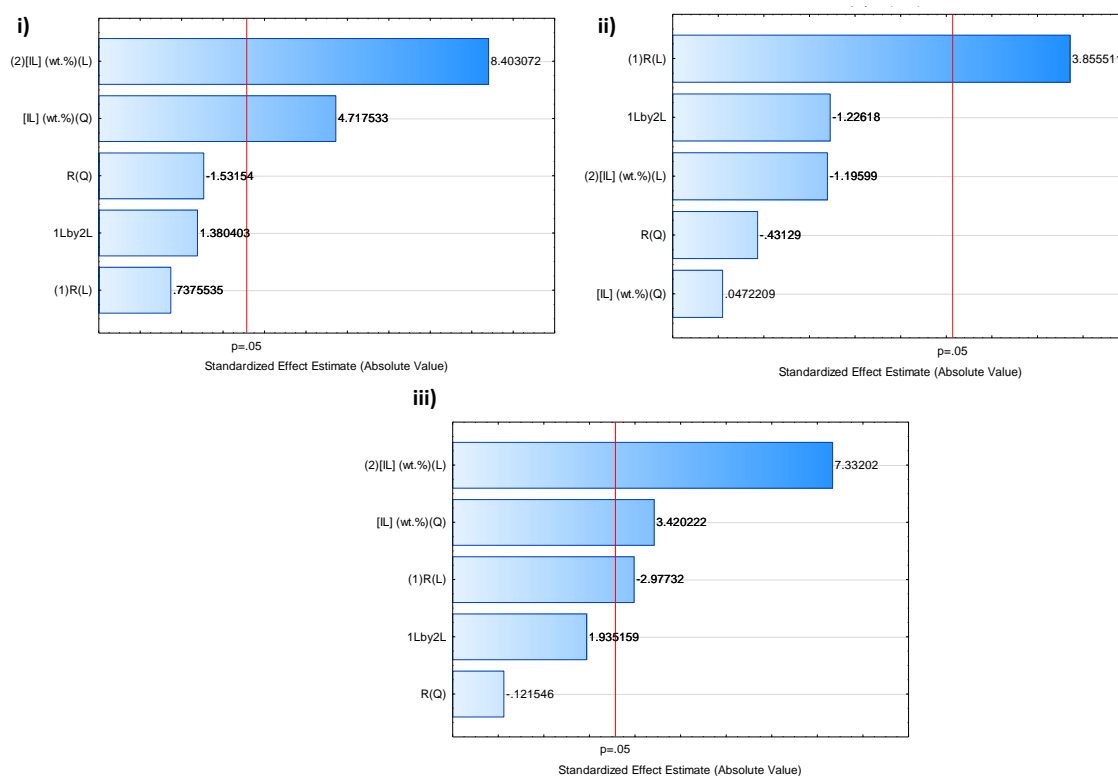**Figure S2.** Pareto charts for the standardized main effects in the factorial planning using [C<sub>16</sub>py]Cl aqueous solutions for (i) chlorophyll *a*, (ii) chlorophyll *b* and (iii) chlorophyll *a/b* ratio. Vertical line indicates the statistical significance of the effects.

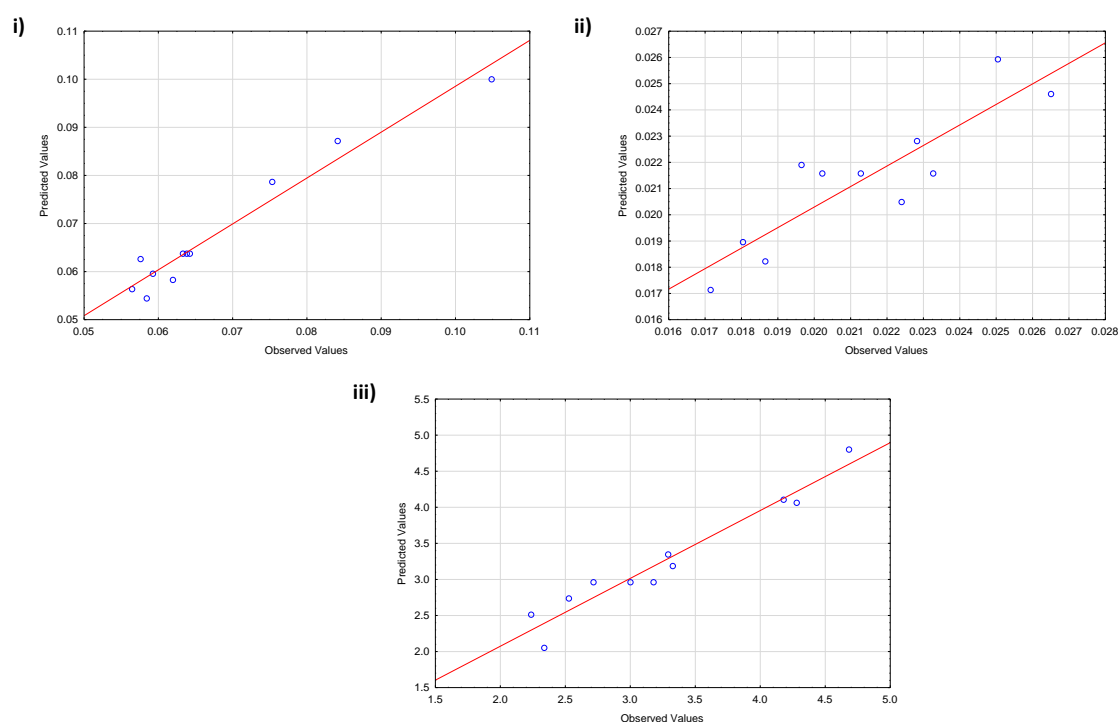

**Figure S3.** Observed values vs Predicted values in the factorial planning [C<sub>16</sub>py]Cl aqueous solutions (i) chlorophyll *a*, (ii) chlorophyll *b* and (iii) chlorophyll *a/b* ratio.

**Table S12.** Experimental data and response surface predicted values of the factorial planning using ethanol aqueous solutions.

|    | [Ethanol]<br>(wt. %) | R     | Chlorophyll <i>a</i> (wt. %) |       |                    | Chlorophyll <i>b</i> (wt. %) |       |                    | Chlorophyll <i>a/b</i> ratio |       |                    |
|----|----------------------|-------|------------------------------|-------|--------------------|------------------------------|-------|--------------------|------------------------------|-------|--------------------|
|    |                      |       | Exp.                         | Pred. | relative error (%) | Exp.                         | Pred. | relative error (%) | Exp.                         | Pred. | relative error (%) |
| 1  | 65.0                 | 0.005 | 0.047                        | 0.044 | 6.36               | 0.037                        | 0.040 | −6.62              | 1.25                         | 1.02  | 18.32              |
| 2  | 95.0                 | 0.005 | 0.099                        | 0.092 | 6.58               | 0.028                        | 0.031 | −10.62             | 3.52                         | 3.19  | 9.43               |
| 3  | 65.0                 | 0.015 | 0.048                        | 0.053 | −12.23             | 0.032                        | 0.032 | 1.86               | 1.48                         | 1.67  | −12.67             |
| 4  | 95.0                 | 0.015 | 0.099                        | 0.101 | −2.34              | 0.027                        | 0.027 | 0.33               | 3.72                         | 3.80  | −2.30              |
| 5  | 58.9                 | 0.010 | 0.036                        | 0.034 | 5.77               | 0.034                        | 0.033 | 2.60               | 1.07                         | 1.07  | −0.39              |
| 6  | 100.0                | 0.010 | 0.099                        | 0.102 | −3.10              | 0.025                        | 0.024 | 6.71               | 3.92                         | 4.08  | −4.02              |
| 7  | 80.0                 | 0.003 | 0.065                        | 0.071 | −10.25             | 0.044                        | 0.040 | 7.76               | 1.47                         | 1.85  | −25.22             |
| 8  | 80.0                 | 0.017 | 0.090                        | 0.084 | 6.58               | 0.031                        | 0.032 | −3.19              | 2.95                         | 2.73  | 7.61               |
| 9  | 80.0                 | 0.010 | 0.081                        | 0.088 | −8.84              | 0.025                        | 0.028 | −8.18              | 3.18                         | 3.21  | −0.84              |
| 10 | 80.0                 | 0.010 | 0.092                        | 0.088 | 3.52               | 0.028                        | 0.028 | 0.12               | 3.32                         | 3.21  | 3.18               |
| 11 | 80.0                 | 0.010 | 0.093                        | 0.088 | 4.63               | 0.029                        | 0.028 | 6.14               | 3.15                         | 3.21  | −1.84              |

**Nomenclature:** [IL]: IL concentration; R: solid-liquid ratio; Exp.: Experimental data; Pred.: predicted values.

**Table S13.** Regression coefficients of the predicted second-order polynomial model for the chlorophyll *a*, from factorial planning using ethanol solutions. R-sqr=.96244; Adj.:92487.

|                | Regression coefficients | Standard deviation | t-student | p-value  |
|----------------|-------------------------|--------------------|-----------|----------|
| Interception   | −0.366                  | 0.1000             | −3.66058  | 0.014586 |
| R              | 5.394                   | 4.6169             | 1.16832   | 0.295349 |
| R <sup>2</sup> | −215.204                | 123.3467           | −1.74471  | 0.141484 |

|                |        |        |          |          |
|----------------|--------|--------|----------|----------|
| C              | 0.009  | 0.0023 | 3.87156  | 0.011742 |
| C <sup>2</sup> | 0.000  | 0.0000 | −3.23975 | 0.022956 |
| C × R          | −0.002 | 0.0484 | −0.03839 | 0.970866 |

**Table S14.** Regression coefficients of the predicted second-order polynomial model for the chlorophyll *b*, from factorial planning using ethanol solutions. R-sqr=.92847; Adj.:85693.

|                | Regression coefficients | Standard deviation | t-student | p-value  |
|----------------|-------------------------|--------------------|-----------|----------|
| Interception   | 0.0884                  | 0.03852            | 2.29546   | 0.070169 |
| R              | −5.0694                 | 1.77789            | −2.85136  | 0.035767 |
| R <sup>2</sup> | 172.1788                | 47.49857           | 3.62493   | 0.015141 |
| C              | −0.0006                 | 0.00089            | −0.64969  | 0.544554 |
| C <sup>2</sup> | 0.0000                  | 0.00001            | 0.25842   | 0.806382 |
| C × R          | 0.0124                  | 0.01862            | 0.66781   | 0.533836 |

**Table S15.** Regression coefficients of the predicted second-order polynomial model for the chlorophyll *a/b* ratio, from factorial planning using ethanol solutions. R-sqr=.98187; Adj.:96374.

|                | Regression coefficients | Standard deviation | t-student | p-value  |
|----------------|-------------------------|--------------------|-----------|----------|
| Interception   | −14.2                   | 4.063              | −3.48989  | 0.017472 |
| R              | 449.4                   | 187.524            | 2.39633   | 0.061901 |
| R <sup>2</sup> | −18901.7                | 5009.951           | −3.77283  | 0.012985 |
| C              | 0.3                     | 0.094              | 3.17896   | 0.024567 |
| C <sup>2</sup> | 0.0                     | 0.001              | −2.45765  | 0.057394 |
| C × R          | −0.1                    | 1.964              | −0.05355  | 0.959371 |

**Table S16.** ANOVA results for the chlorophyll *a* extraction from factorial planning using ethanol solutions.

| Chlorophyll <i>a</i> |                |                    |             |          |          |
|----------------------|----------------|--------------------|-------------|----------|----------|
|                      | Sum of squares | Degrees of freedom | Mean square | F-value  | p-value  |
| Regression           | 0.005894       | 5                  | 0.001179    | 15.05493 | 0.004913 |
| Residuals            | 0.000392       | 5                  | 0.000078    |          |          |
| Total                | 0.006286       |                    |             |          |          |

**Table S17.** ANOVA results for the chlorophyll *b* extraction from factorial planning using ethanol solutions.

| Chlorophyll <i>b</i> |                |                    |             |          |          |
|----------------------|----------------|--------------------|-------------|----------|----------|
|                      | Sum of squares | Degrees of freedom | Mean square | F-value  | p-value  |
| Regression           | 0.000319       | 5                  | 0.000064    | 9.005930 | 0.015353 |
| Residuals            | 0.000035       | 5                  | 0.000007    |          |          |
| Total                | 0.000354       |                    |             |          |          |

**Table S18.** ANOVA results for the chlorophyll *a/b* ratio extraction from factorial planning using ethanol solutions.

| Chlorophyll <i>b</i> |                |                    |             |          |          |
|----------------------|----------------|--------------------|-------------|----------|----------|
|                      | Sum of squares | Degrees of freedom | Mean square | F-value  | p-value  |
| Regression           | 11.17708       | 5                  | 2.235416    | 18.22878 | 0.003166 |

|           |          |   |          |
|-----------|----------|---|----------|
| Residuals | 0.61316  | 5 | 0.122631 |
| Total     | 11.79024 |   |          |

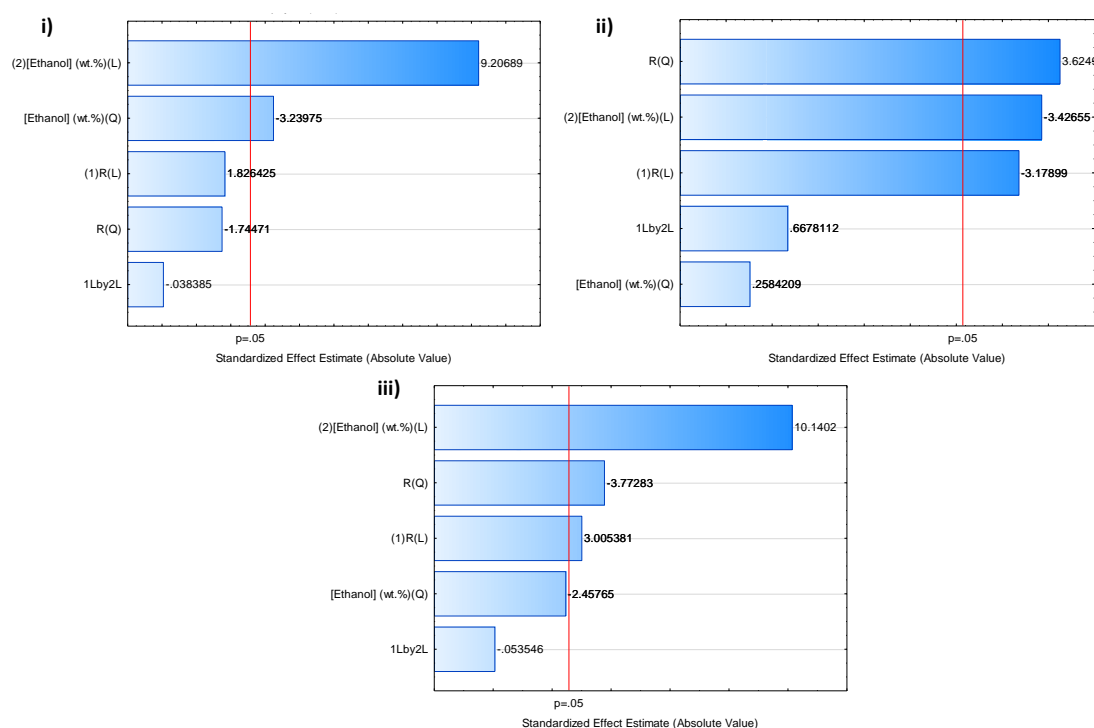

**Figure S4.** Pareto charts for the standardized main effects in the factorial planning using ethanol solutions for (i) chlorophyll *a*, (ii) chlorophyll *b* and (iii) chlorophyll *a/b* ratio. Vertical line indicates the statistical significance of the effects.

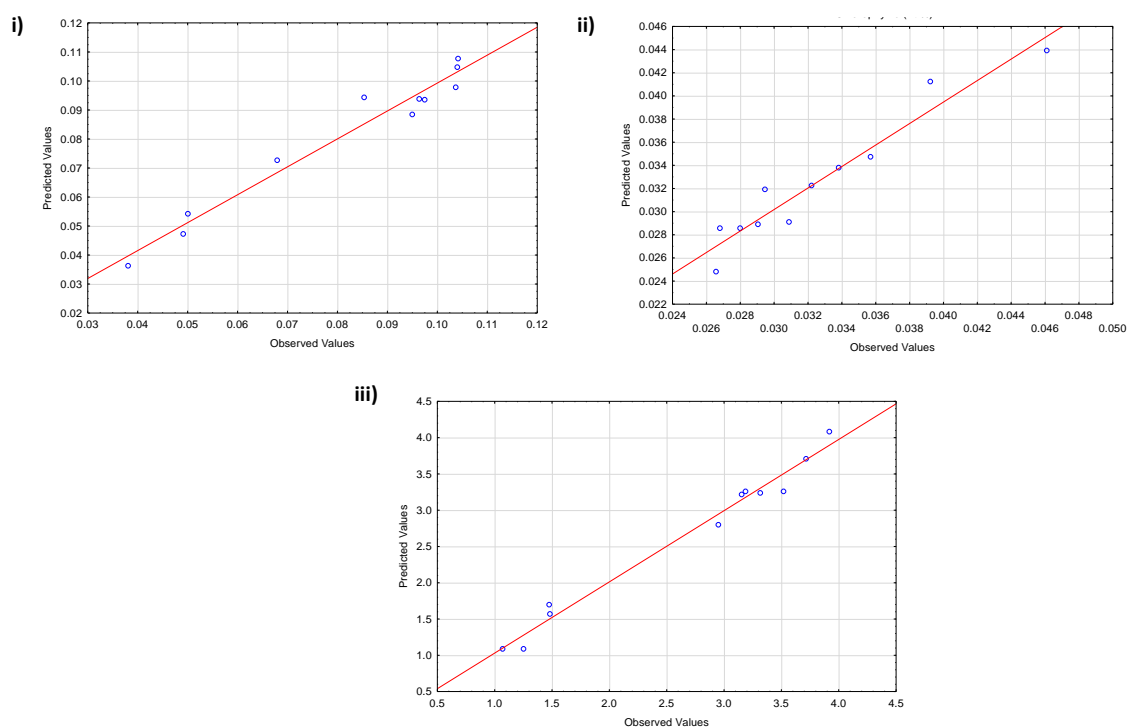

**Figure S5.** Observed values vs Predicted values in the factorial planning ethanol solutions (i) chlorophyll *a*, (ii) chlorophyll *b* and (iii) chlorophyll *a/b* ratio.

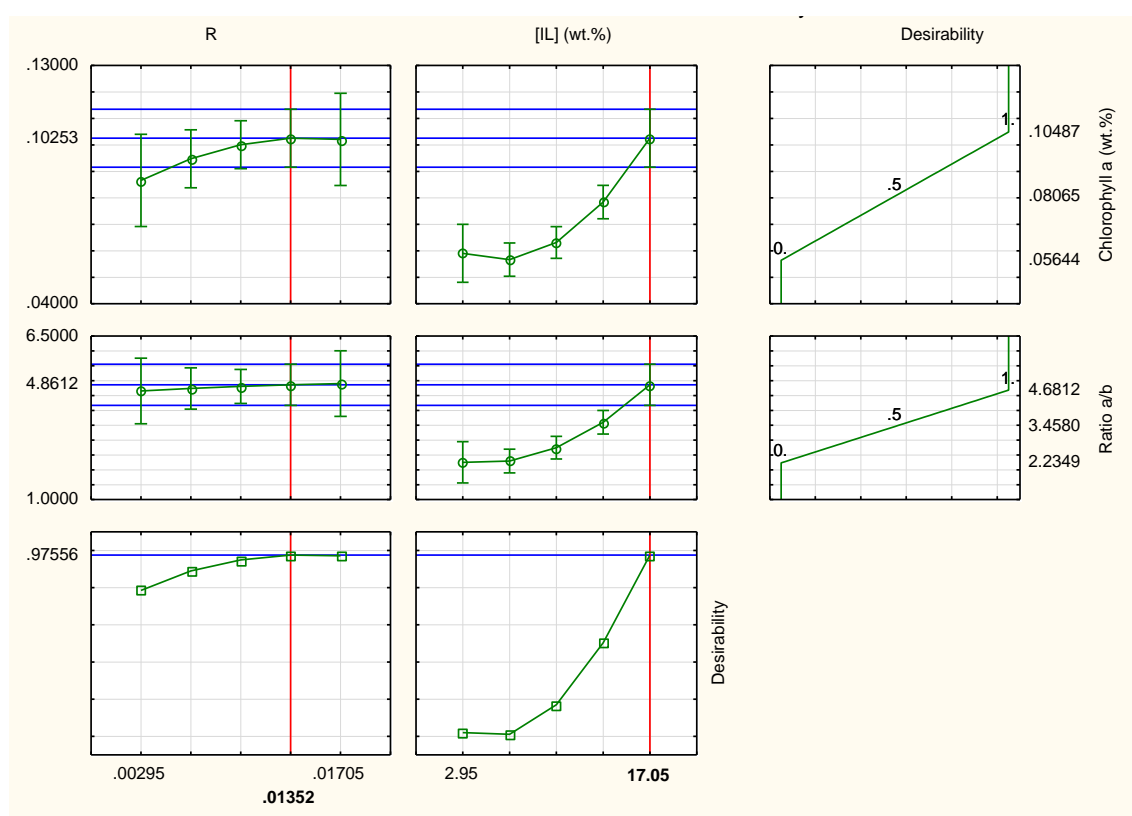

**Figure S6.** Profile of prediction of the optimal operating conditions to obtain the maximum yield of chlorophyll *a* and the chlorophylls *a/b* ratio.

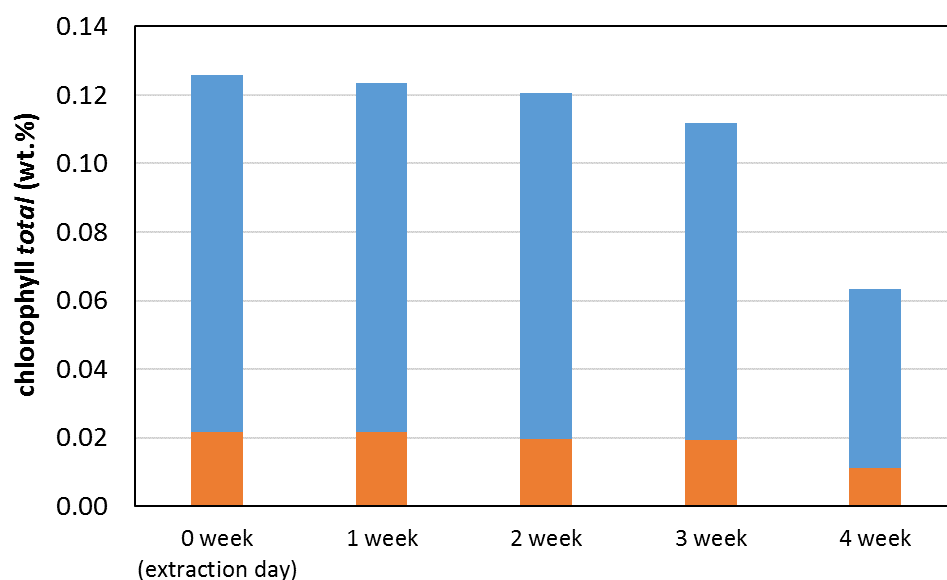

**Figure S7.** Profile of chlorophyll *a* (■) and *b* (■) content in the extract during the storage time, at 4°C and protect of the light.

**Table S19.** Profile of chlorophyll *a* and *b* content in the extract during the storage time, at 4°C and protect of the light.

| Storage time               | Chlorophyll <i>a</i> (wt. %) |   |       | Chlorophyll <i>b</i> (wt. %) |   |       |
|----------------------------|------------------------------|---|-------|------------------------------|---|-------|
| 0 week<br>(extraction day) | 0.104                        | ± | 0.009 | 0.022                        | ± | 0.004 |
| 1 week                     | 0.102                        | ± | 0.010 | 0.022                        | ± | 0.004 |

|        |       |   |       |       |   |       |
|--------|-------|---|-------|-------|---|-------|
| 2 week | 0.101 | ± | 0.011 | 0.020 | ± | 0.007 |
| 3 week | 0.093 | ± | 0.010 | 0.019 | ± | 0.007 |
| 4 week | 0.053 | ± | 0.010 | 0.011 | ± | 0.008 |

## References

1. Aguiar, J.; Molina-Bolívar, J. A.; Peula-García, J. M.; Carnero Ruiz, C., Thermodynamics and micellar properties of tetradecyltrimethylammonium bromide in formamide-water mixtures. *J. Colloid. Interface Sci.* **2002**, 255, (2), 382-90.
2. Mukhim, T.; Dey, J.; Das, S.; Ismail, K., Aggregation and adsorption behavior of cetylpyridinium chloride in aqueous sodium salicylate and sodium benzoate solutions. *J. Colloid Interface Sci.* **2010**, 350, (2), 511-515.
3. Bhattacharya, S.; Haldar, J., Microcalorimetric and Conductivity Studies with Micelles Prepared from Multi-Headed Pyridinium Surfactants. *Langmuir* **2005**, 21, (13), 5747-5751.
4. Bento, R. M. F.; Almeida, M. R.; Bharmoria, P.; Freire, M. G.; Tavares, A. P. M., Improvements in the enzymatic degradation of textile dyes using ionic-liquid-based surfactants. *Sep. Purif. Technol.* **2020**, 235, 116191.
5. Goronja, J. M.; Janošević-Ležaić, A. M.; Dimitrijević, B. M.; Malenović, A. M.; Stanisavljev, D. R.; Pejić, N. D., Determination of critical micelle concentration of cetyltrimethylammonium bromide: Different procedures for analysis of experimental data. *Hem. Ind.* **2016**, 40, (4), 485-492.
6. Schaeffer, N.; Passos, H.; Gras, M.; Mogilireddy, V.; Leal, J. P.; Pérez-Sánchez, G.; Gomes, J. R. B.; Billard, I.; Papaiconomou, N.; Coutinho, J. A. P., Mechanism of ionic-liquid-based acidic aqueous biphasic system formation. *Phys. Chem. Chem. Phys.* **2018**, 20, (15), 9838-9846.
